# Supplementary material for: Transcriptional-regulatory convergence across functional MDD risk variants identified by massively parallel reporter assays
Source: PubMed Central journal article supplement (PMC8298436; doi:10.1038/s41398-021-01493-6), 2021-07-22

A)

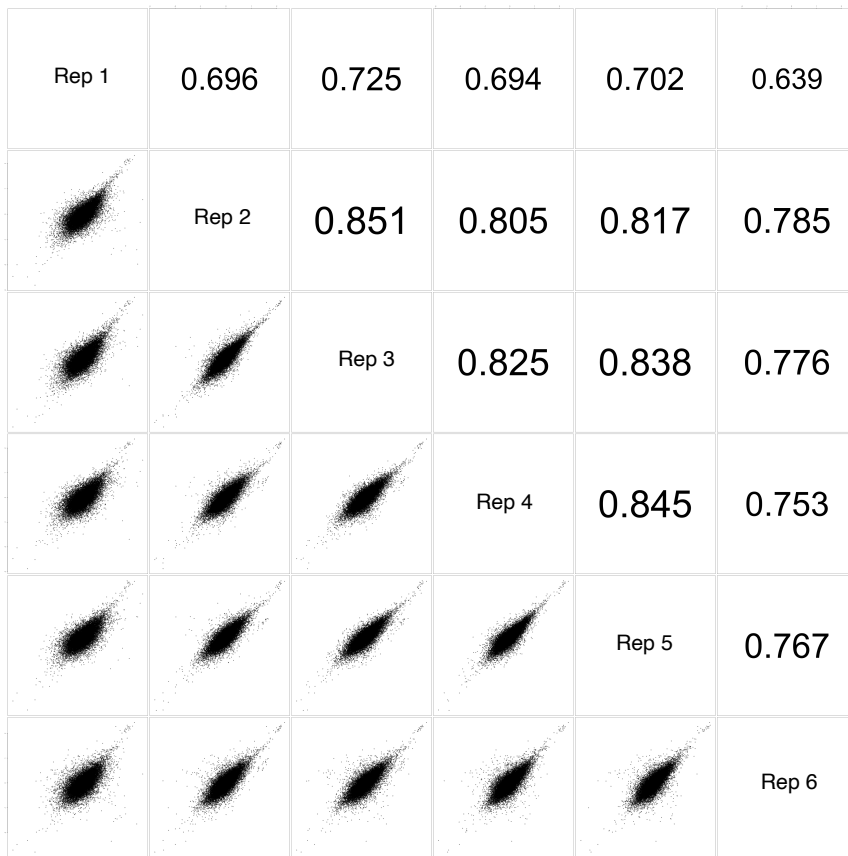

B)

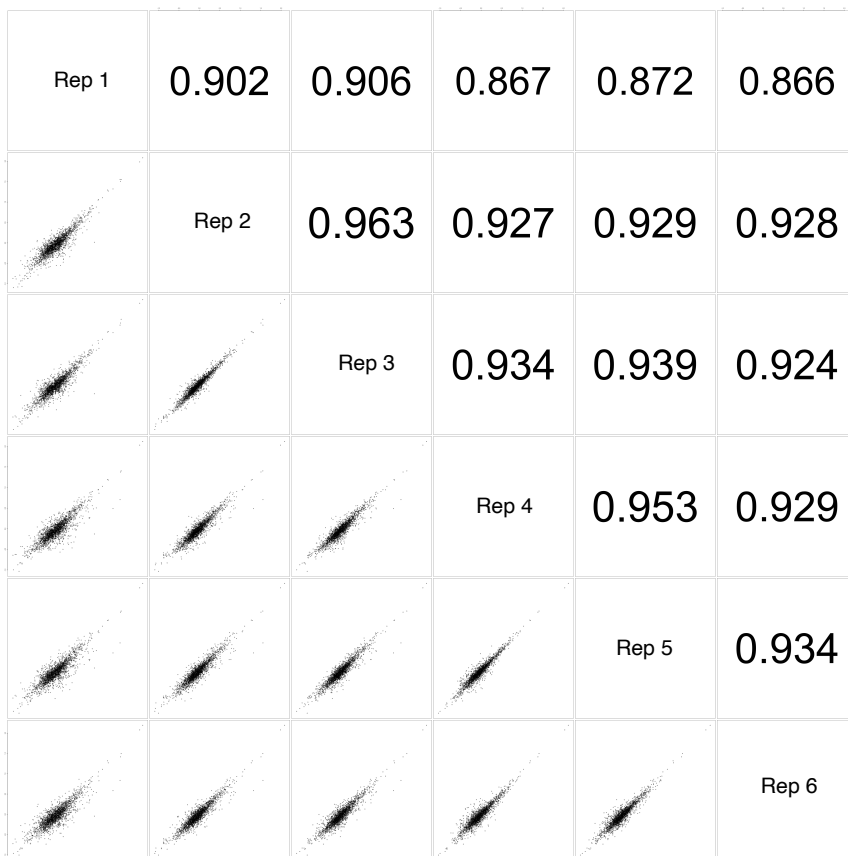

Supplement: 41398_2021_1493_MOESM2_ESM.pdf [file 41398_2021_1493_MOESM2_ESM.pdf]
